# Supplementary material
Source: publisher figshare collection journal article supplement (https://sage.figshare.com/ndownloader/files/20537397)
Supplement: Supplementary file 1 [file 20537397]

## SUPPLEMENTAL MATERIAL

**Supplemental Table:** TDD of vancomycin comparing the actual trough-based and calculated AUC:MIC-based strategies, stratified by BMI group (sensitivity analyses)

| BMI group                                                                              | Vancomycin TDD, mean (SD)<br>Trough-based dosing | Vancomycin TDD, mean (SD)<br>AUC:MIC-based dosing | p-value           |
|----------------------------------------------------------------------------------------|--------------------------------------------------|---------------------------------------------------|-------------------|
| <b>Utilizing actual culture MIC <sup>1</sup></b>                                       |                                                  |                                                   |                   |
| ≥30 kg/m <sup>2</sup> (n=68)                                                           | 2637.25 (1327.89)                                | 1884.33 (807.31)                                  | <b>0.0001</b>     |
| <30 kg/m <sup>2</sup> (n=51)                                                           | 2205.88 (1115.48)                                | 1799.23 (810.76)                                  | <b>0.0377</b>     |
| Total (n=119)                                                                          | 2390.76 (1224.59)                                | 1835.70 (806.96)                                  | <b>&lt;0.0001</b> |
| <b>Utilizing IBW only in Cockcroft-Gault CrCl calculations <sup>2</sup></b>            |                                                  |                                                   |                   |
| ≥30 kg/m <sup>2</sup> (n=68)                                                           | 2637.25 (1327.89)                                | 1764.39 (621.54)                                  | <b>&lt;0.0001</b> |
| <30 kg/m <sup>2</sup> (n=51)                                                           | 2205.88 (1115.48)                                | 2018.19 (614.6)                                   | 0.2951            |
| Total (n=119)                                                                          | 2390.76 (1224.59)                                | 1909.42 (627.75)                                  | <b>0.0002</b>     |
| <b>Utilizing IBW/AdjBW without scalar weight-adjusted VancCl equation <sup>3</sup></b> |                                                  |                                                   |                   |
| ≥30 kg/m <sup>2</sup> (n=68)                                                           | 2637.25 (1327.89)                                | 2057.61 (625.16)                                  | <b>0.0014</b>     |
| <30 kg/m <sup>2</sup> (n=51)                                                           | 2205.88 (1115.48)                                | 2034.84 (608.68)                                  | 0.3388            |
| Total (n=119)                                                                          | 2390.76 (1224.59)                                | 2044.6 (613.27)                                   | <b>0.0063</b>     |

*AdjBW = adjusted body weight; AUC = area under the curve; BMI = body mass index; CrCl = creatinine clearance; IBW = ideal body weight; MIC = minimum inhibitory concentration; SD = standard deviation; TDD = total daily dose*

<sup>1</sup> *Analysis utilized the actual culture MIC for each patient, as opposed to assuming an MIC =1*

<sup>2</sup> *Analysis utilized IBW for all patients in CrCl calculations, as opposed to incorporating AdjBW for patients with high BMI*

<sup>3</sup> *Analysis calculated VancCl standardly across all patients, as opposed to applying the scalar weight equation for patients with high BMI*
